# Supplementary material
Source: MDPI journal article supplement (https://www.mdpi.com/1424-8247/15/2/189)
Supplement: s1 [file s1]

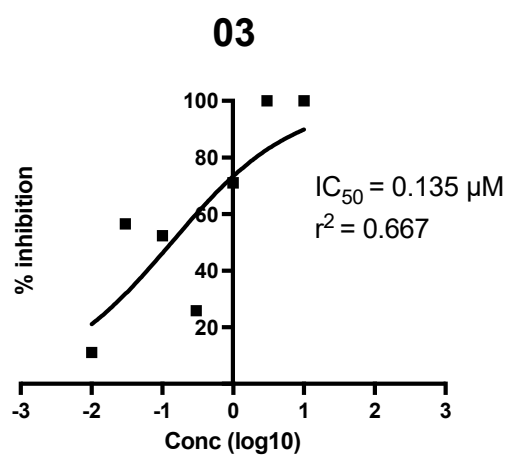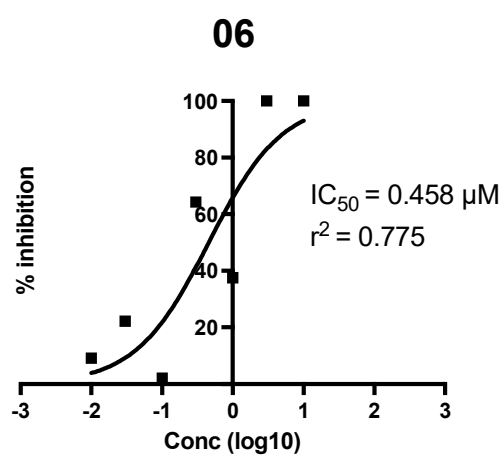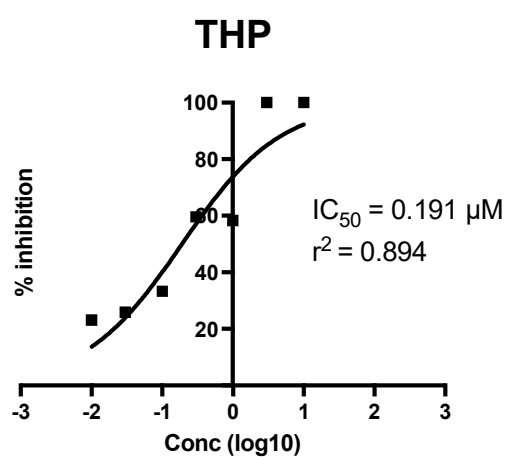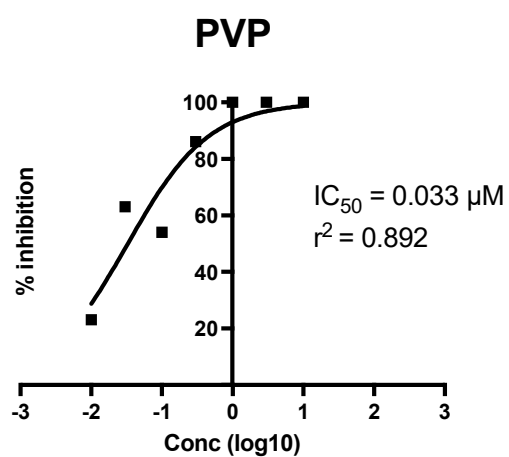

**Supporting Information Figure S1.** Molting assay. The number of L3 that molted to L4 *in vitro* was counted for each treatment group and controls. The  $IC_{50}$ s were calculated using the percent inhibition of molting compared to the proportion of L3 under control conditions that molted to L4.

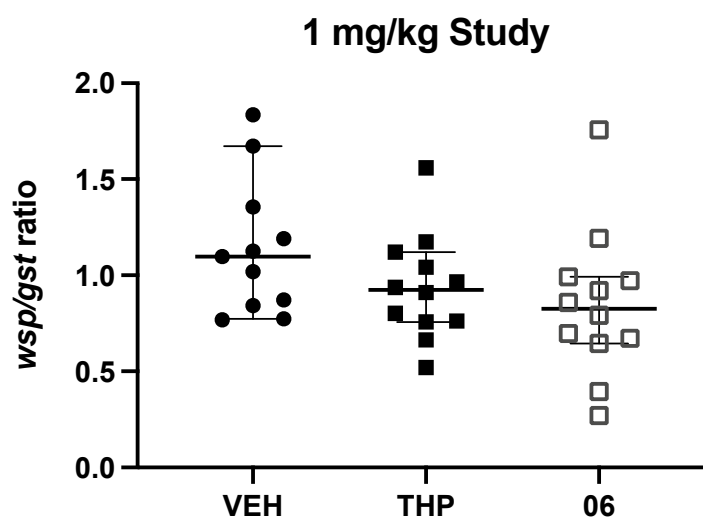

**Supporting Information Figure S2.** *Wolbachia* titers from *B. pahangi* female worms recovered at necropsy. There was no reduction in *Wolbachia* titers in female worms from any treatment group as measured by qPCR.

| Compound | <i>O. volvulus</i> L5 (Ov L5)<br>% inhibition of motility<br>Day 36 @ 1 uM<br>(worm assay) | <i>O. volvulus</i> L5 (Ov L5)<br>% inhibition of viability<br>Day 37<br>(MTT assay) |
|----------|--------------------------------------------------------------------------------------------|-------------------------------------------------------------------------------------|
| 01       | 94                                                                                         | 87                                                                                  |
| 02       | *90 (day 16)                                                                               | nd                                                                                  |
| 05       | 92                                                                                         | 76                                                                                  |
| 06       | 94                                                                                         | 88                                                                                  |
| THP      | 68                                                                                         | 52                                                                                  |
| PVP      | **100 (day 14)                                                                             | 100                                                                                 |
| DMSO     | 0                                                                                          | 0                                                                                   |

**Supporting Information Table S1.** Comparison of the inhibition of Ov L5 worm motility and worm viability as measured by the MTT assay were well-correlated; \*assay with 02 was stopped on day 16 due to contamination and MTT was not done (nd); \*\*all worms treated with PVP were dead by day 14.

| Stages of development | Vehicle    | THP                     | 06                       | PVP |
|-----------------------|------------|-------------------------|--------------------------|-----|
| Eggs                  | 56.0 ± 6.3 | 43.5 ± 6.9              | 34.3 ± 6.4<br>(P<0.05)   | *   |
| Embryos               | 14.6 ± 1.7 | 10.9 ± 2.0              | 9.6 ± 1.9                | *   |
| Pre-mf                | 8.9 ± 1.6  | 12.2 ± 3.0              | 10.0 ± 2.1               | *   |
| Stretched mf          | 13.8 ± 3.5 | 6.7 ± 1.5               | 7.6 ± 1.6                | *   |
| Deformed              | 6.7 ± 4.4  | 26.8 ± 11.0<br>(P<0.05) | 38.5 ± 11.0<br>(P<0.001) | *   |

**Supporting Information Table S2:** Embryogram analyses. Mean counts of each developmental stage ± SEM shown above. 200 events were counted for each worm. \*Only one female worm was recovered from the PVP group so no embryogram analysis was conducted.
